# Supplementary material
Source: PubMed Central journal article supplement (PMC7472876)
Supplement: NIHMS1611782-supplement-Supplemental_data.pdf [file NIHMS1611782-supplement-Supplemental_data.pdf]

# Breast Biopsy Site Markers

## BD® Breast Tissue Markers

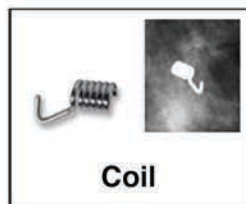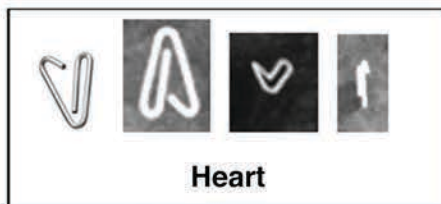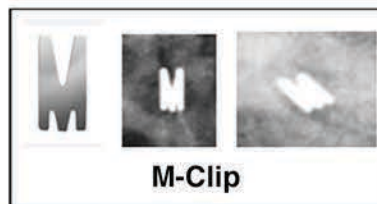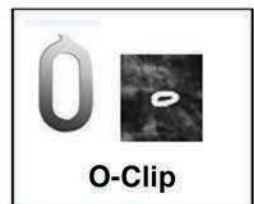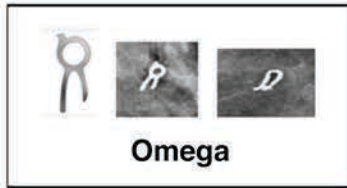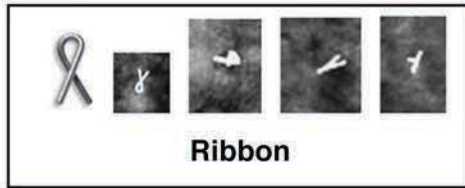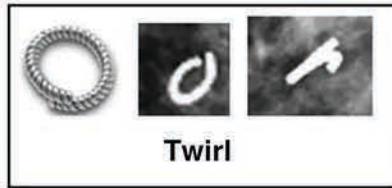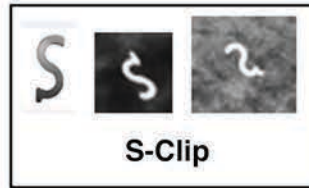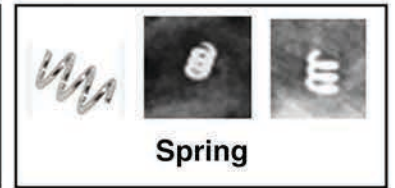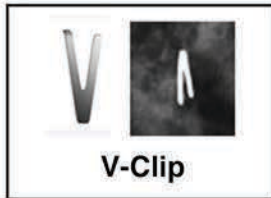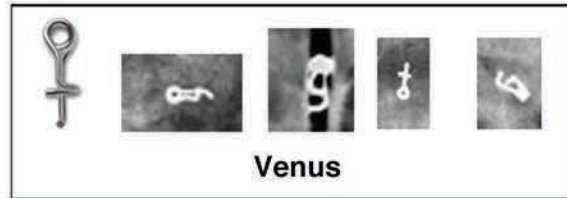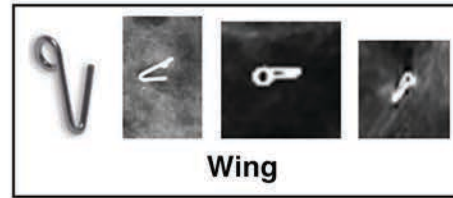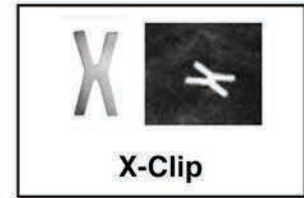

© 2017 BD, Inc. Images used with permission.

Bard, Gel Mark Ultra, Gel Mark UltraCor, SenoMark, SenoMark UltraCor, StarchMark, StarchMark UltraCor, Twirl, UltraClip and UltraCor are trademarks and/or registered trademarks of C. R. Bard, Inc.

## Hologic® Breast Biopsy Markers

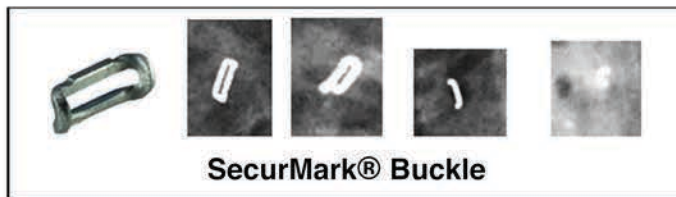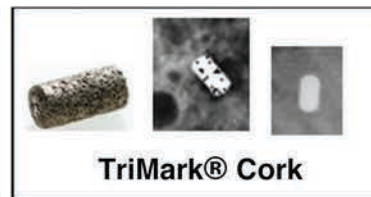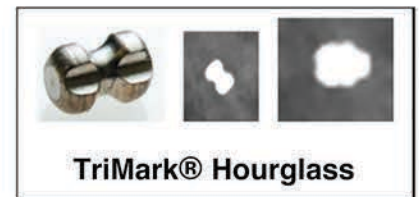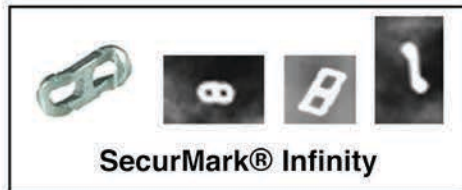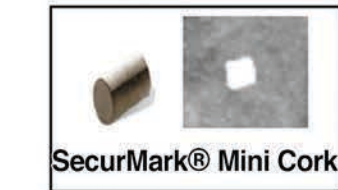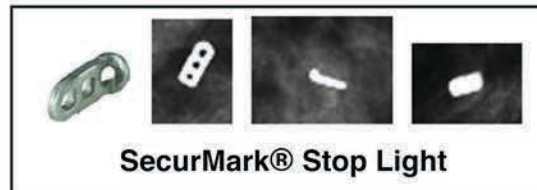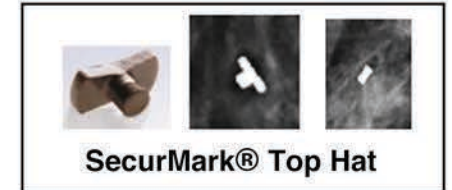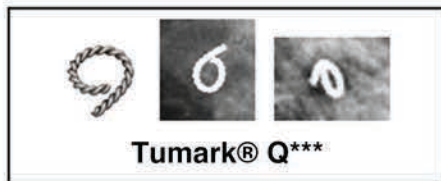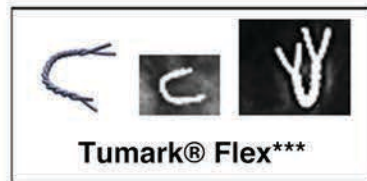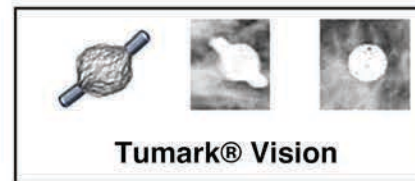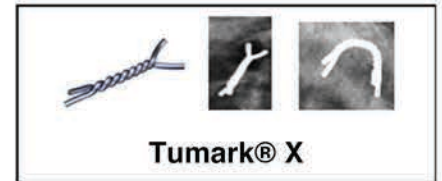

© Copyright 2017 Hologic, Inc. Images provided courtesy of HOLOGIC, Inc. and affiliates.

\*\*\* Tumark® Q & Tumark® Flex are also distributed by MPM Medical Supply.

## Mammotome® Breast Biopsy Markers

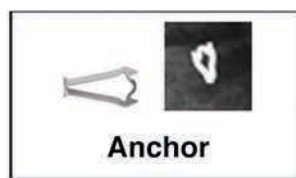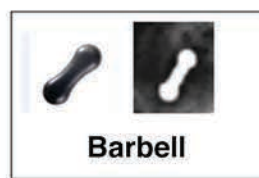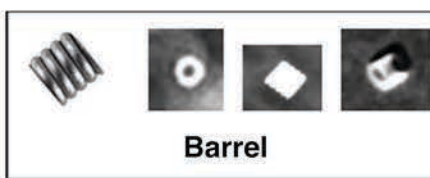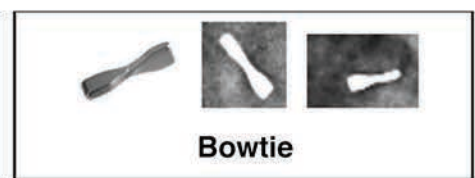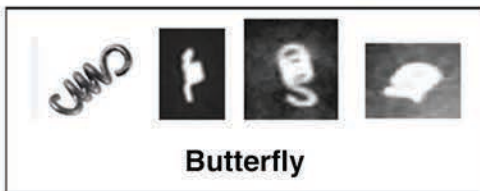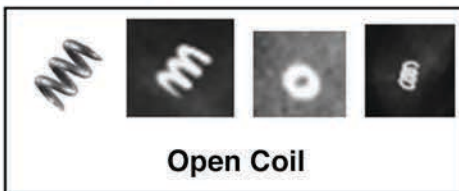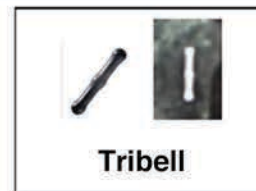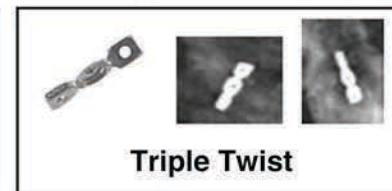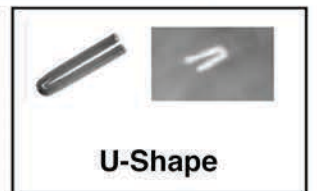

© 2017 Devicor Medical Products, Inc., part of Leica Biosystems. Images used with permission.

## MPM Medical Supply \*\*\*

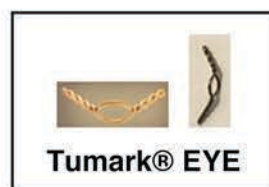

Image used with permission from MPM Medical Supply and Somatex Medical Technologies.

\*\*\* Tumark® Q & Tumark® Flex are also distributed by MPM Medical Supply.

## Argon Medical Devices

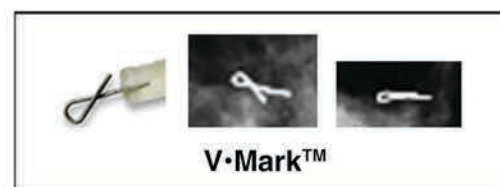

Image used with permission from Argon Medical Devices, Inc.

## Mermaid Medical®

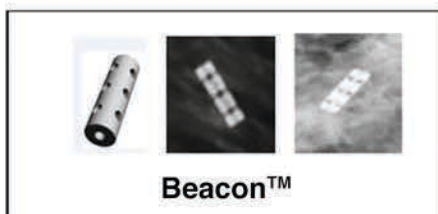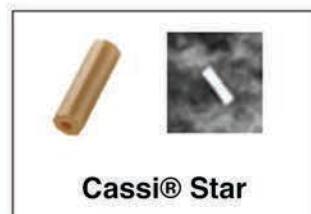

Image used with permission from Mermaid Medical®.

## MammoMARK / CorMARK (discontinued 2010)

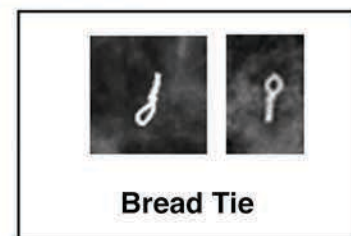

© 2017 Devicor Medical Products, Inc., part of Leica Biosystems. Images used with permission.

Fig. S1—Chart shows standardization of breast biopsy site marker nomenclature.
